# Supplementary material
Source: HighWire-hosted journal article supplement (https://bmjopen.bmj.com/content/12/8/e058799)
Supplement: inline-supplementary-material-7 [file inline-supplementary-material-7.pdf]

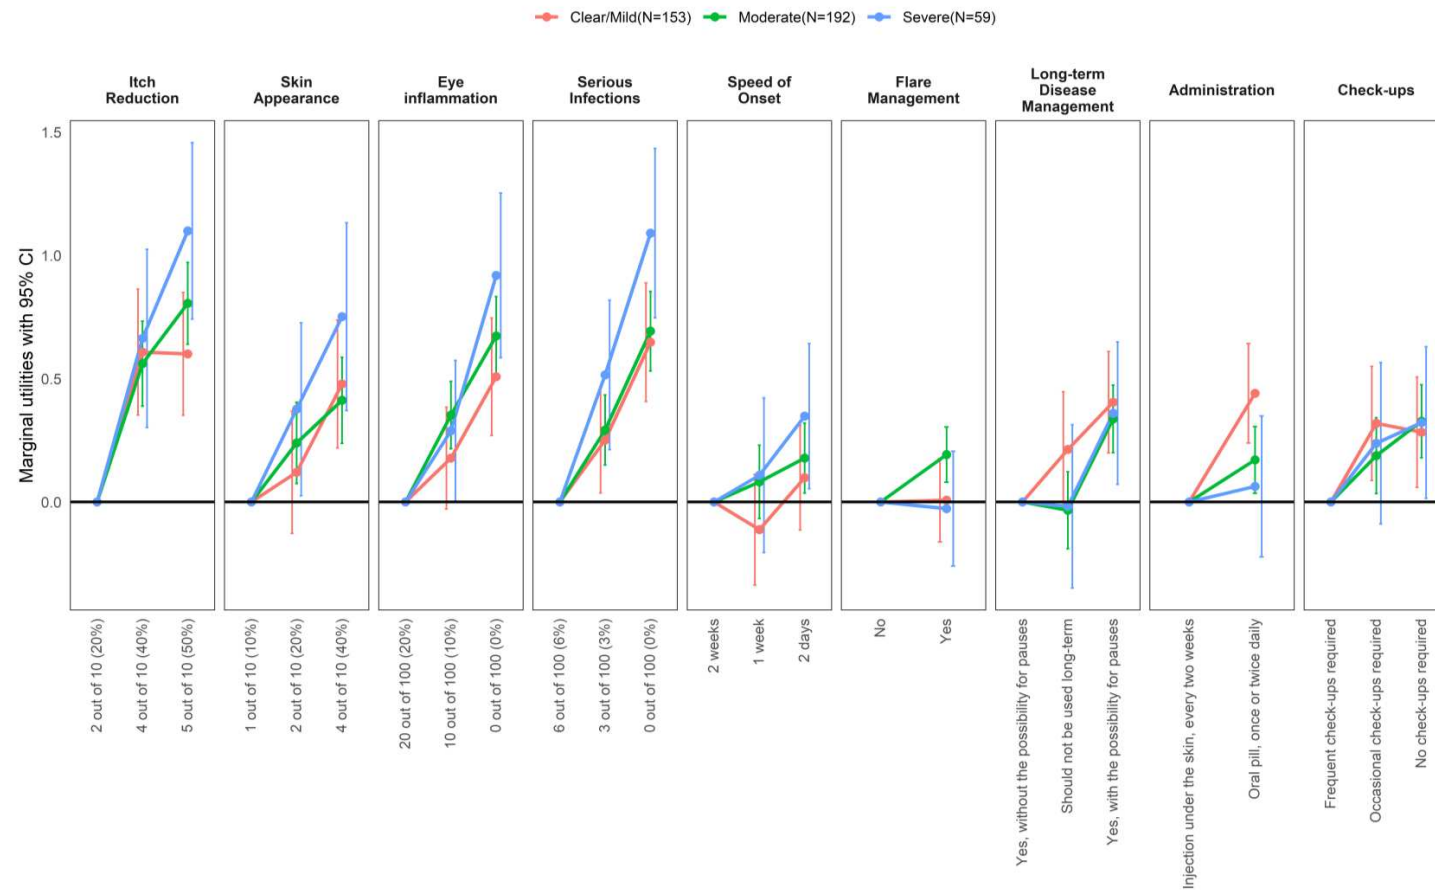

**Supplemental Figure 6. MNL results by Patient Oriented Eczema Measure (POEM) overall score. Clear/Mild: 0–7; Moderate: 8–16; Severe: 17–28.**

Abbreviation: CI, confidence interval
