# Supplementary material
Source: HighWire-hosted journal article supplement (https://bmjopen.bmj.com/content/12/8/e058799)
Supplement: inline-supplementary-material-9 [file inline-supplementary-material-9.pdf]

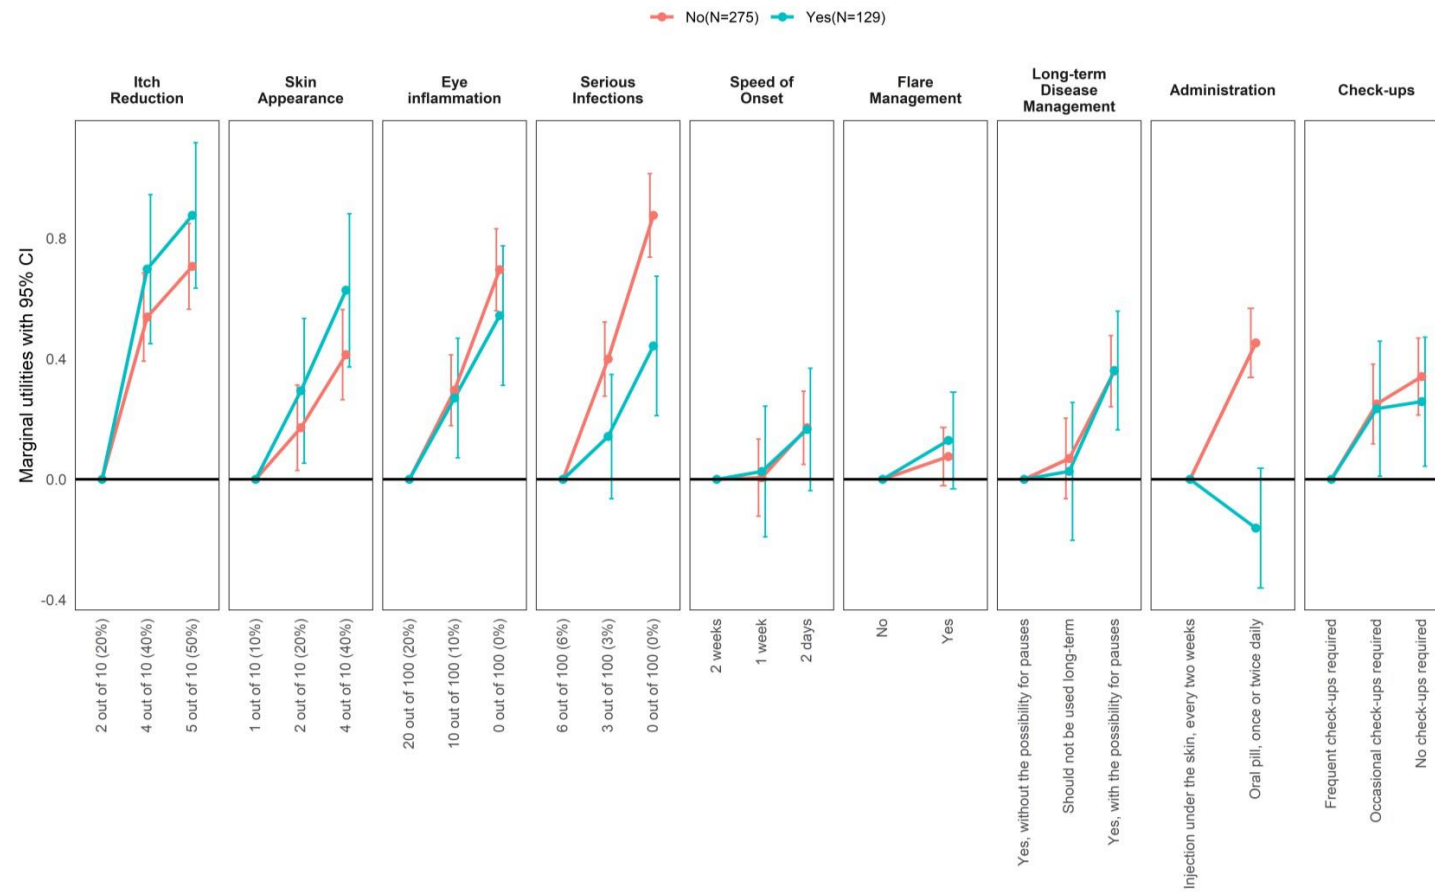

**Supplemental Figure 8. MNL results by experience self-injecting**  
Abbreviation: CI, confidence interval
